# Supplementary material for: Titanium oxide morphology controls charge collection efficiency in quantum dot solar cells
Source: Royal Society of Chemistry journal article supplement (doi:10.1039/c6cp07364f), 2017-01-01
Supplement: c6cp07364f1.pdf [file c6cp07364f1.pdf]

## Electronic Supplementary Information

### Titanium Oxide Morphology Controls Charge Collection Efficiency in Quantum Dot Solar Cells

Ankita Kolay, P Naresh Kumar, Sarode Krishna Kumar, Melepurath Deepa\*

#### Fluorescence decay analysis of TiO<sub>2</sub>/CdS films

The emission decay plots of CdS, TiO<sub>2</sub> NSHs/CdS, TiO<sub>2</sub> PNPs/CdS, TiO<sub>2</sub> NPs/CdS and TiO<sub>2</sub> NWs/CdS films (in Figure 2d) were fitted into bi-exponential functions based on  $\chi^2$  values. The emission average life times, and fitted parameters are tabulated in the Table S1.

$$f(t) = B_1 e^{-t/\tau_1} + B_2 e^{-t/\tau_2} \quad (1)$$

$$\langle \tau \rangle = \frac{\sum B_i \tau_i^2}{\sum B_i \tau_i} \quad (2)$$

In (1) and (2),  $B_i$  is the decay amplitude,  $t$  is the time after excitation,  $\tau$  is the electron lifetime and  $\langle \tau \rangle$  is the average electron lifetime.

Table S1 Kinetic parameters of emission decay analysis of photosensitizer films deduced from double exponential fits.

| Sample                    | $B_1$ | $\tau_1$ (ns) | $B_2$ | $\tau_2$ (ns) | $\langle \tau \rangle$ (ns) | $\chi^2$ |
|---------------------------|-------|---------------|-------|---------------|-----------------------------|----------|
| CdS                       | 19.46 | 0.00944       | 80.54 | 4.77          | 4.77                        | 1.04     |
| TiO <sub>2</sub> NSHs/CdS | 97.82 | 0.00615       | 2.18  | 1.41          | 1.182                       | 1.13     |
| TiO <sub>2</sub> PNPs/CdS | 99.38 | 0.00623       | 0.62  | 1.78          | 1.145                       | 0.95     |
| TiO <sub>2</sub> NPs/CdS  | 20.45 | 0.0379        | 79.55 | 1.14          | 1.135                       | 0.97     |
| TiO <sub>2</sub> NWs/CdS  | 19.64 | 0.00354       | 80.36 | 0.553         | 0.552                       | 1.04     |

#### Surface area and porosity studies

Brunauer-Emmett-Teller (BET) surface area analysis and Barrett-Joyner-Halenda (BJH) pore size and volume analysis were performed under Nitrogen at 77.3 K, after degassing at 300 °C for 3 h. Figure S1 shows the BET analysis plots, and from the analysis it is deduced that TiO<sub>2</sub> NSHs have the highest surface area, followed by TiO<sub>2</sub> PNPs, TiO<sub>2</sub> NPs and TiO<sub>2</sub> NWs. The data for surface area, and pore volume of the TiO<sub>2</sub> morphologies are listed in Table S2. CdS QDs are incorporated within these morphologies, depending on the size and volume of the pores, and the effective available surface area of TiO<sub>2</sub>.

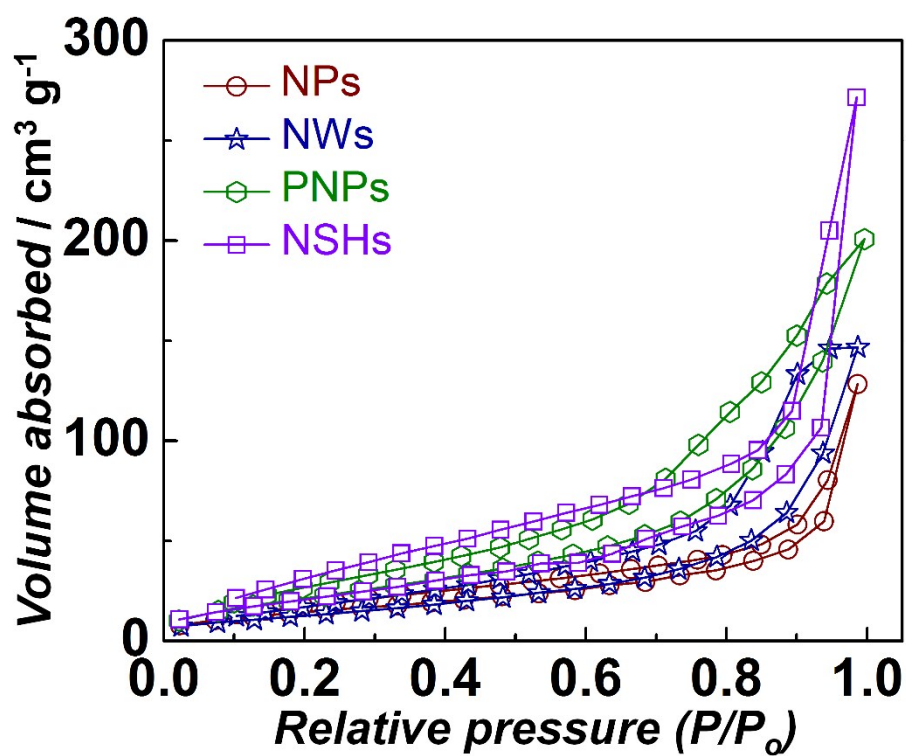

Figure S1 Adsorption-desorption isotherms of different TiO<sub>2</sub> morphologies.

Table S2 BET and BJH analysis data for different TiO<sub>2</sub> morphologies.

| Morphology            | Surface area (m <sup>2</sup> g <sup>-1</sup> ) | Pore volume (cm <sup>3</sup> g <sup>-1</sup> ) |
|-----------------------|------------------------------------------------|------------------------------------------------|
| TiO <sub>2</sub> NPs  | 64.304                                         | 0.198                                          |
| TiO <sub>2</sub> NWs  | 61.82                                          | 0.227                                          |
| TiO <sub>2</sub> PNP  | 102.359                                        | 0.3107                                         |
| TiO <sub>2</sub> NSHs | 111.968                                        | 0.42                                           |

## J-V characteristics

Table S3 Solar cell parameters of the 5-cells for each TiO<sub>2</sub> morphology measured using carbon fabric as the counter electrode in a 0.1 M Na<sub>2</sub>S electrolyte (in 3:7 v/v of water:methanol), under 1 sun illumination (AM 1.5, 100 mW cm<sup>-2</sup>).

| Cells                     | J <sub>sc</sub><br>(mA cm <sup>-2</sup> ) | V <sub>oc</sub> (V) | FF     | Efficiency<br>(η, %) |
|---------------------------|-------------------------------------------|---------------------|--------|----------------------|
| TiO <sub>2</sub> NWs/CdS  |                                           |                     |        |                      |
| Cell 1                    | 14.856                                    | 0.978               | 43.27  | 6.288                |
| Cell 2                    | 14.856                                    | 0.978               | 43.18  | 6.275                |
| Cell 3                    | 14.256                                    | 0.912               | 44.98  | 5.849                |
| Cell 4                    | 13.731                                    | 0.973               | 43.23  | 5.776                |
| Cell 5                    | 13.726                                    | 0.958               | 42.67  | 5.611                |
| Average                   | 14.285                                    | 0.959               | 43.46  | 5.959                |
| TiO <sub>2</sub> NPs/CdS  |                                           |                     |        |                      |
| Cell 1                    | 14.645                                    | 0.978               | 38.79  | 5.557                |
| Cell 2                    | 14.219                                    | 0.988               | 38.67  | 5.433                |
| Cell 3                    | 13.59                                     | 0.933               | 36.6   | 4.641                |
| Cell 4                    | 13.279                                    | 0.943               | 37.03  | 4.637                |
| Cell 5                    | 13.951                                    | 0.882               | 36.4   | 4.48                 |
| Average                   | 13.936                                    | 0.944               | 37.49  | 4.949                |
| TiO <sub>2</sub> PNPs/CdS |                                           |                     |        |                      |
| Cell 1                    | 16.439                                    | 0.857               | 38.33  | 5.401                |
| Cell 2                    | 15.322                                    | 0.852               | 39.36  | 5.139                |
| Cell 3                    | 14.947                                    | 0.862               | 39.43  | 5.081                |
| Cell 4                    | 11.731                                    | 0.923               | 40.32  | 4.366                |
| Cell 5                    | 11.00                                     | 0.938               | 41.5   | 4.282                |
| Average                   | 13.8878                                   | 0.8864              | 39.788 | 4.854                |
| TiO <sub>2</sub> NSHs/CdS |                                           |                     |        |                      |
| Cell 1                    | 5.839                                     | 0.963               | 47.69  | 2.682                |
| Cell 2                    | 5.713                                     | 0.928               | 47.26  | 2.506                |
| Cell 3                    | 5.215                                     | 0.938               | 50.57  | 2.474                |
| Cell 4                    | 5.109                                     | 0.953               | 50.42  | 2.455                |
| Cell 5                    | 5.702                                     | 0.933               | 45.65  | 2.429                |
| Average                   | 5.5156                                    | 0.943               | 48.318 | 2.509                |

## Electrolyte effect on photovoltaic performance of TiO<sub>2</sub> NPs based cells

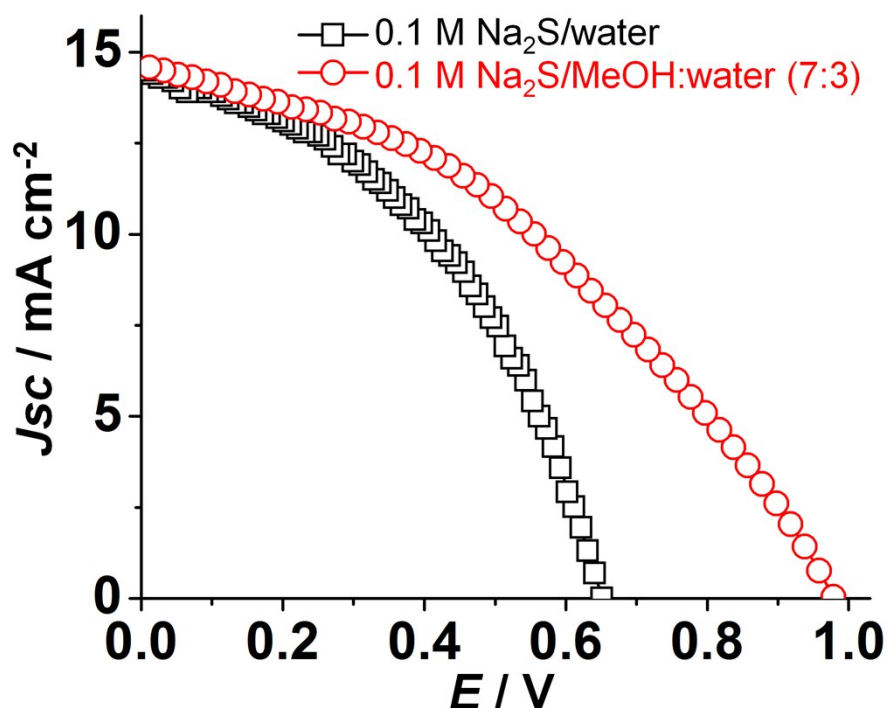

Figure S2 J-V characteristics for cells with a TiO<sub>2</sub> NPs/CdS photoanode and a carbon fabric as the counter electrode with two different electrolytes (under 1 sun illumination, AM 1.5).

Table S4 Solar cell parameters of cells with a TiO<sub>2</sub> NPs/CdS photoanode and a carbon fabric as the counter electrode with different listed electrolytes. Exposed cell area is 0.06 to 0.08 cm<sup>2</sup> and measurements are performed under 1 sun illumination (100 mW cm<sup>-2</sup>).

| Electrolyte                                 | V <sub>OC</sub> (mV) | J <sub>SC</sub> (mA cm <sup>-2</sup> ) | FF   | η <sub>champion</sub> (%) | η <sub>avg</sub> (%) |
|---------------------------------------------|----------------------|----------------------------------------|------|---------------------------|----------------------|
| 0.1 M Na <sub>2</sub> S solution in water   | 651                  | 14.49                                  | 0.44 | 4.18                      | 3.72                 |
| 0.1 M Na <sub>2</sub> S in MeOH:water (7:3) | 978                  | 14.645                                 | 0.38 | 5.557                     | 4.949                |

Table S5 Comparison of J<sub>SC</sub> and J<sub>IPCE</sub> values for cells with different TiO<sub>2</sub> morphologies.

| Photoanode                | J <sub>SC</sub> (mA cm <sup>-2</sup> ) from J-V | J <sub>IPCE</sub> (mA cm <sup>-2</sup> ) from IPCE |
|---------------------------|-------------------------------------------------|----------------------------------------------------|
| TiO <sub>2</sub> NSHs/CdS | 5.84                                            | 5.70                                               |
| TiO <sub>2</sub> PNPs/CdS | 16.43                                           | 15.97                                              |
| TiO <sub>2</sub> NPs/CdS  | 14.22                                           | 14.1                                               |
| TiO <sub>2</sub> NWS/CdS  | 14.85                                           | 14.4                                               |
